# Supplementary material
Source: Springer Nature journal article supplement (https://www.springermedizin.de/resource/supplementary/12879_2010_1497_MOESM1_ESM.pdf/9442660)

First author, year [reference]

Risk Ratio, 95% CI

**Gastroenterological staff**

|                   |      |
|-------------------|------|
| Abbas 1998        | [30] |
| Birkenfeld 2004   | [26] |
| Braden 1997       | [32] |
| Chong 1994        | [35] |
| Goh 1996          | [33] |
| Liu 1996          | [34] |
| Mastromarino 2005 | [25] |
| Nishikawa 1998    | [31] |

RR (95% CI): 1.75 (1.39-2.20)

Heterogeneity:  $\text{Chi}^2 = 62.49$ ,  $P < 0.00001$

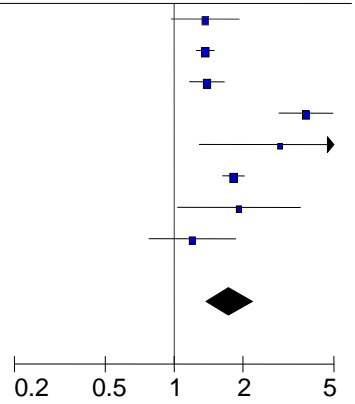

**Gastroenterologists**

|                   |      |
|-------------------|------|
| Abbas 1998        | [30] |
| Birkenfeld 2004   | [26] |
| Braden 1997       | [32] |
| Chong 1994        | [35] |
| Goh 1996          | [33] |
| Hildebrand 2000   | [27] |
| Lin 1994          | [36] |
| Liu 1996          | [34] |
| Mastromarino 2005 | [25] |
| Monés 1999        | [29] |
| Nishikawa 1998    | [31] |
| Potts 1997        | [47] |
| Su 1996           | [48] |

RR (95% CI): 1.62 (1.33-1.97)

Heterogeneity:  $\text{Chi}^2 = 85.69$ ,  $P < 0.00001$

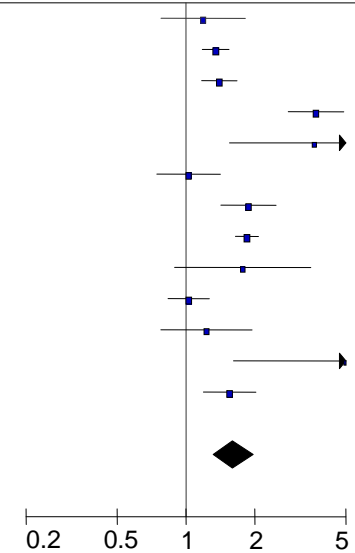

**Gastroenterological assistants**

|                   |      |
|-------------------|------|
| Abbas 1998        | [30] |
| Birkenfeld 2004   | [26] |
| Braden 1997       | [32] |
| Chong 1994        | [35] |
| Ellett 1999       | [28] |
| Goh 1996          | [33] |
| Lin 1994          | [36] |
| Liu 1996          | [34] |
| Mastromarino 2005 | [25] |
| Nishikawa 1998    | [31] |
| Noone 2006        | [46] |

RR (95% CI): 1.41 (1.13-1.77)

Heterogeneity:  $\text{Chi}^2 = 43.57$ ,  $P < 0.00001$

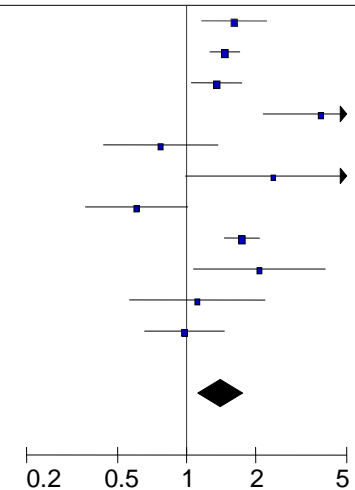

Supplement: MOESM1 [file 9442660]
